# Supplementary material
Source: Springer Nature journal article supplement (https://www.springermedizin.de/resource/supplementary/12992_2013_306_MOESM3_ESM.pdf/9616196)

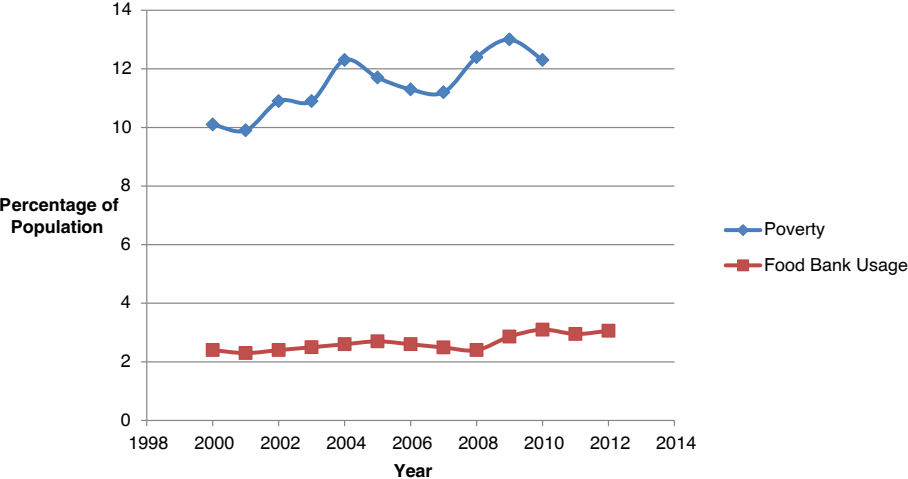

Source: Statistics Canada 2012 and Food Banks Canada 2012

Supplement: MOESM3 [file 9616196]
